# Supplementary material for: V2O5/functionalized MWCNT hybrid nanocomposite: the fabrication and its enhanced supercapacitive performance
Source: Royal Society of Chemistry journal article supplement (doi:10.1039/c4ra05942e), 2014-01-01
Supplement: c4ra05942e1.pdf [file c4ra05942e1.pdf]

## Electronic Supplementary Information (ESI)

### **V<sub>2</sub>O<sub>5</sub>/ Functionalized MWCNT hybrid nanocomposite: the fabrication and its enhanced supercapacitive performance**

Balakrishnan Saravanakumar <sup>a</sup>, Kamatchi Kamaraj Purushothaman <sup>b</sup>, Gopalan Muralidharan <sup>c\*</sup>

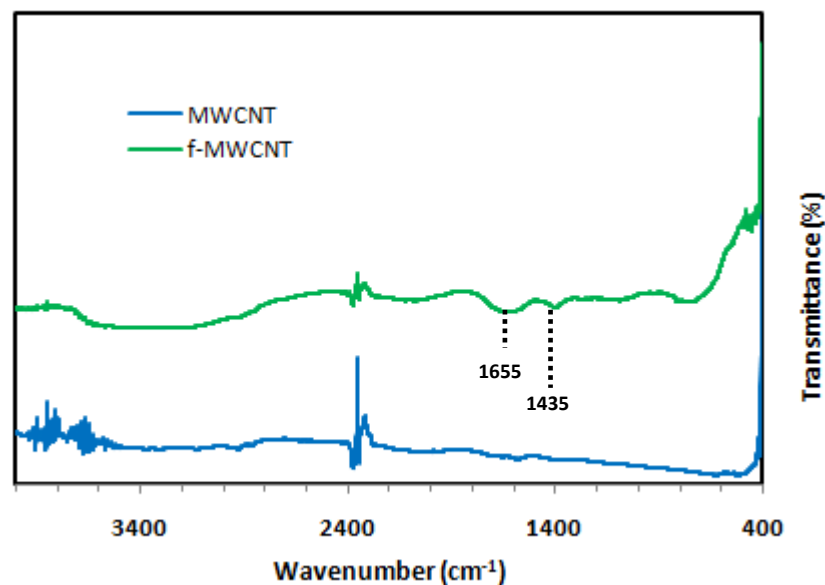

**Fig S1.** FTIR spectra for MWCNT and f-MWCNT.

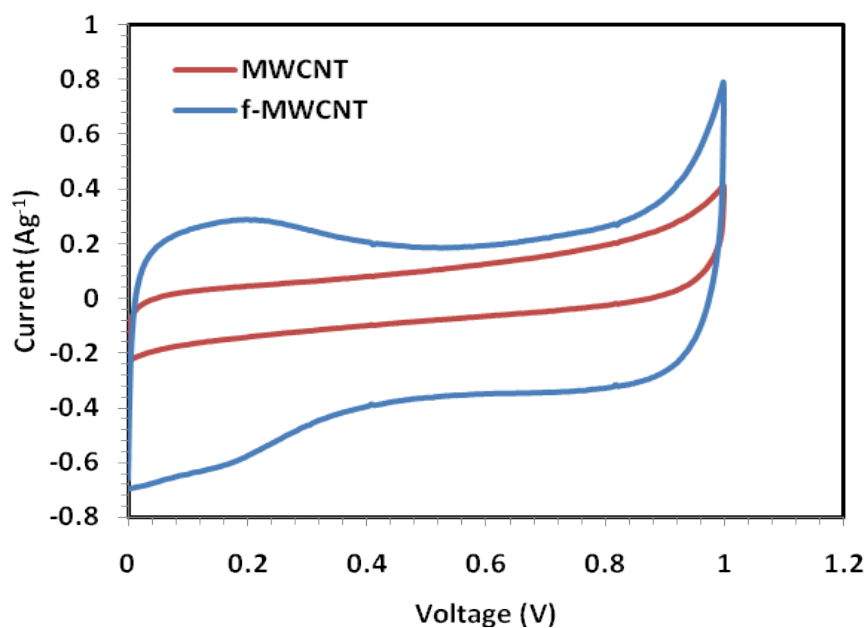

**Fig S2.** CV curves of MWCNT and f-MWCNT at scan rate of 5 mVs<sup>-1</sup>.

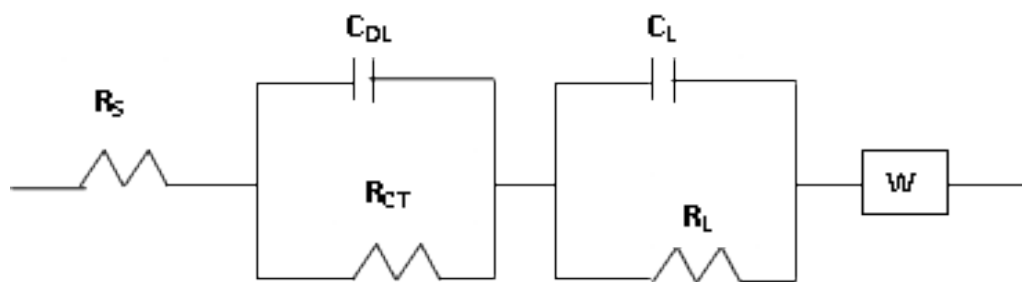

**Fig S3.** Equivalent circuit model.
